# Supplementary material
Source: Springer Nature journal article supplement (https://www.springermedizin.de/resource/supplementary/12885_2012_4044_MOESM5_ESM.pdf/9465072)
Supplement: MOESM5 [file 9465072]

| Case | 5' BRCA1 (TC)n                                                                                    |                                                                                                    | 3' BRCA1 (GAAA)n                                                                                    |                                                                                                     |
|------|---------------------------------------------------------------------------------------------------|----------------------------------------------------------------------------------------------------|-----------------------------------------------------------------------------------------------------|-----------------------------------------------------------------------------------------------------|
|      | Normal                                                                                            | Tumor                                                                                              | Normal                                                                                              | Tumor                                                                                               |
| #2   | No amplification                                                                                  | Homozygous                                                                                         | Homozygous                                                                                          | Homozygous                                                                                          |
| #7   | Heterozygous<br>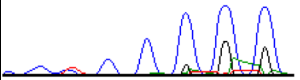 | Heterozygous<br> | Heterozygous                                                                                        | Heterozygous                                                                                        |
| #14  | Heterozygous                                                                                      | Heterozygous                                                                                       | Heterozygous                                                                                        | Heterozygous                                                                                        |
| #17  | Heterozygous                                                                                      | Heterozygous                                                                                       | Heterozygous<br> | Heterozygous<br> |
| #22  | Heterozygous                                                                                      | Heterozygous                                                                                       | Heterozygous                                                                                        | Heterozygous                                                                                        |

| Case | 5' BRCA2 (CA)n   |              | 3' BRCA2 (CA)n |              |
|------|------------------|--------------|----------------|--------------|
|      | Normal           | Tumor        | Normal         | Tumor        |
| #2   | No amplification | Heterozygous | Homozygous     | Homozygous   |
| #7   | Heterozygous     | Heterozygous | Homozygous     | Homozygous   |
| #14  | Heterozygous     | Heterozygous | Heterozygous   | Heterozygous |
| #17  | Heterozygous     | Heterozygous | Homozygous     | Homozygous   |
| #22  | Homozygous       | Homozygous   | Homozygous     | Homozygous   |
